# Supplementary material for: Sex differences in the human peripheral blood transcriptome
Source: Springer Nature journal article supplement (doi:10.1186/1471-2164-15-33), 2014-01-01
Supplement: 12864_2013_5693_MOESM3_ESM.pdf [file 12864_2013_5693_MOESM3_ESM.pdf]

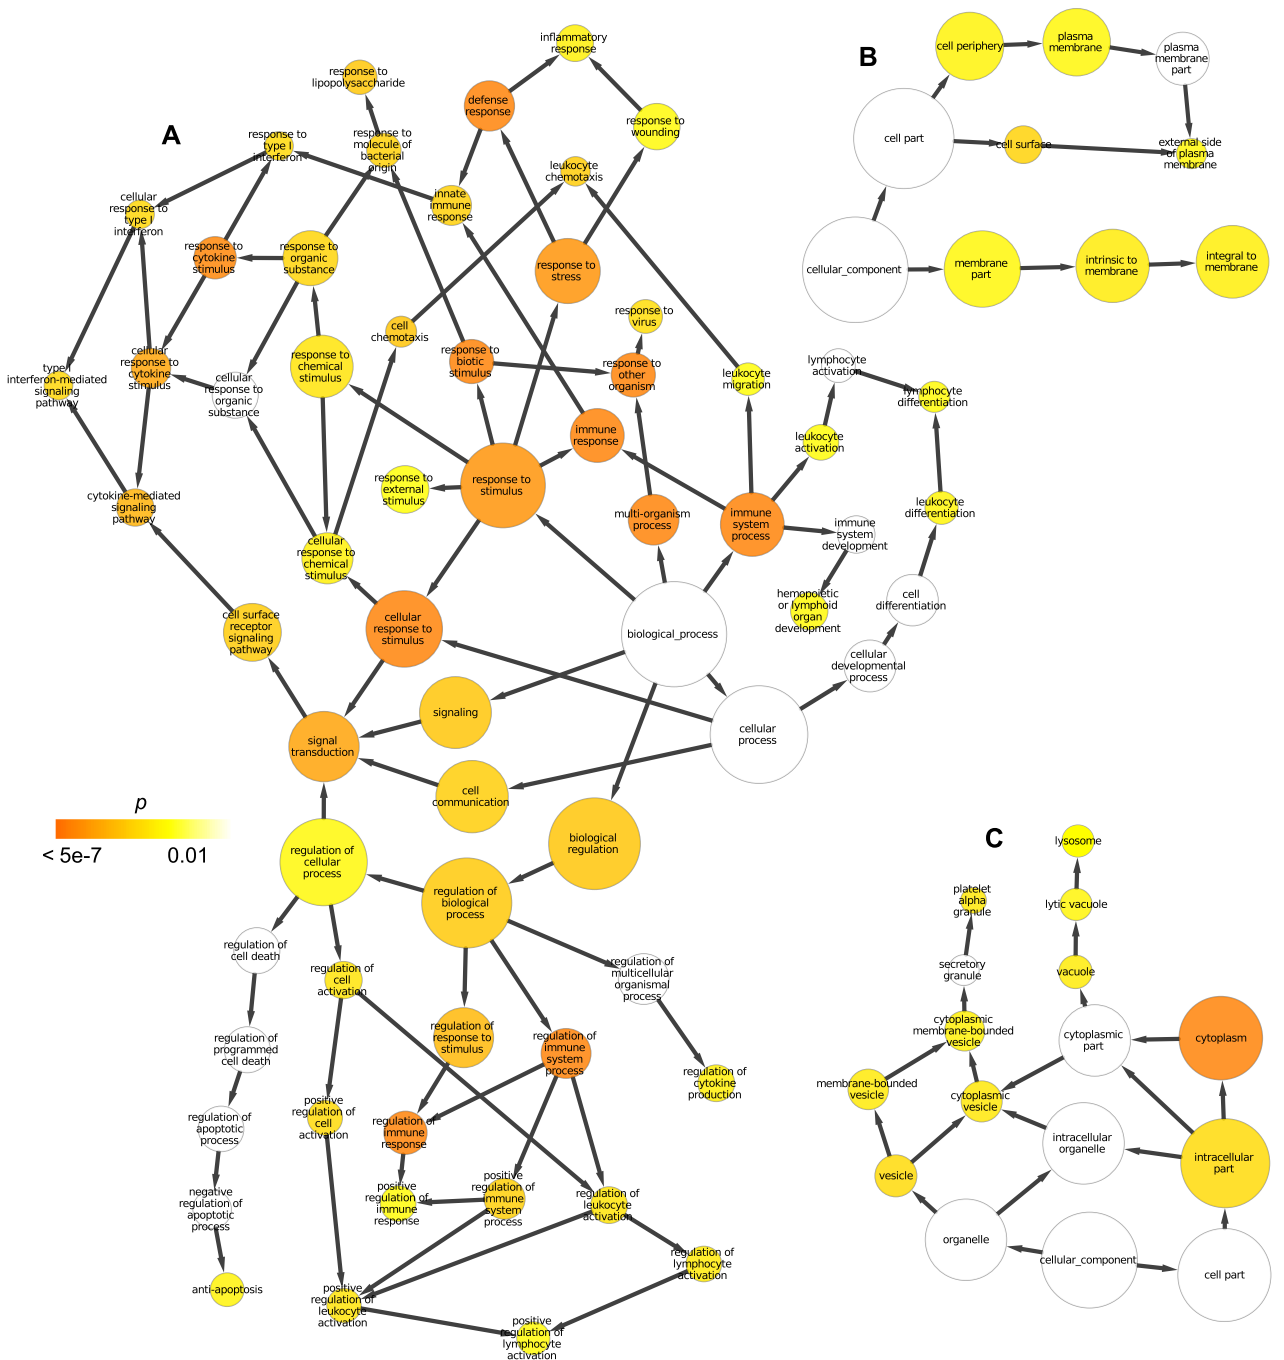

**Supl. Fig. S1.** Hierarchical structure of Gene Ontology categories enriching male or female-biased genes. GO enrichment analysis for female (A, B) and male-biased genes (C) in the main categories biological process (A, C) and cellular component (B). GO categories are represented as circles, size of circle shows total amount of genes in this category, color of circle codes for  $p$ -value for enrichment (the color white means not significant). An arrow pointing from category A to category B means that B is a subcategory of A. GO categories containing few genes with no further subcategories often occur at the outside of the network, and provide the most specific classification, such as categories response to type 1 interferon, lymphocyte differentiation, anti-apoptosis and lysosome.
