# Supplementary material for: Sex differences in the human peripheral blood transcriptome
Source: Springer Nature journal article supplement (doi:10.1186/1471-2164-15-33), 2014-01-01

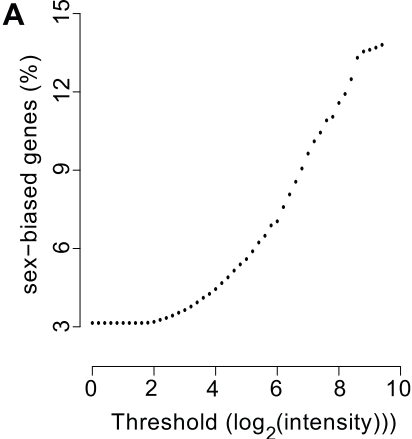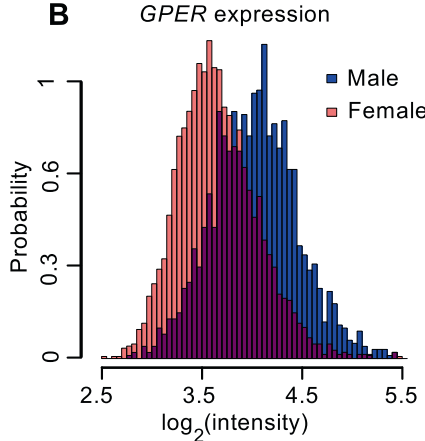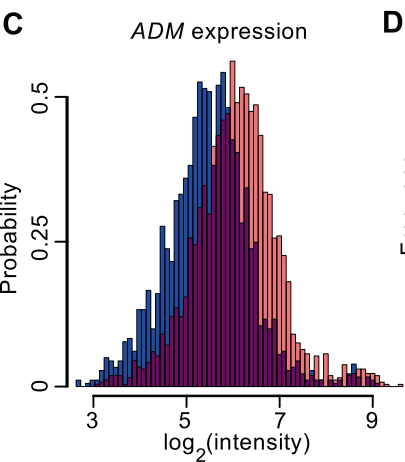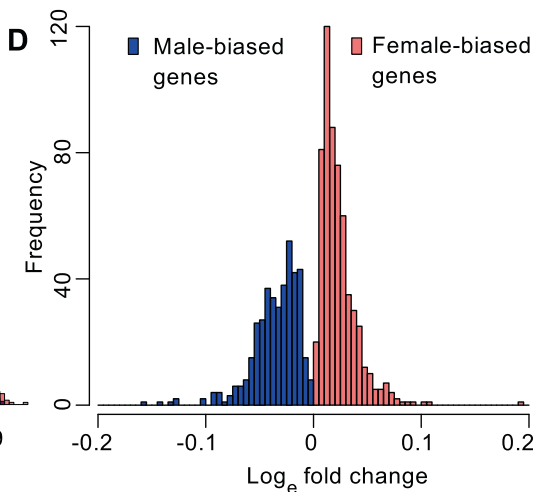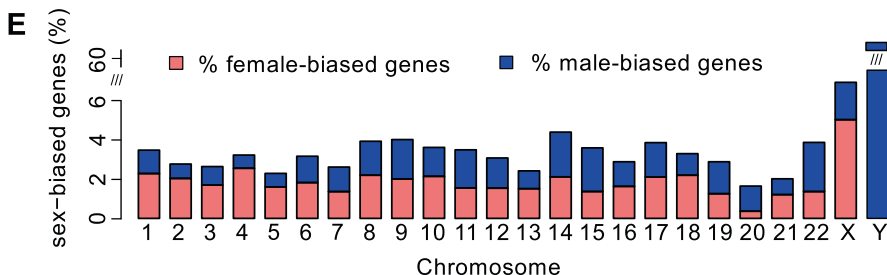

Supplement: 12864_2013_5693_MOESM13_ESM.pdf [file 12864_2013_5693_MOESM13_ESM.pdf]
